# Supplementary material for: Forest Conservation and Restoration Using the Emberger Index: Cork Oak as Study Case
Source: MDPI journal article supplement (doi:10.3390/f13020252), 2022-02-06
Supplement: s1 [file s1]

Archive with 2 entries (2 files):
- Supplementary material 2.xlsx
- Supplementary Material 1.pdf
