# Supplementary material for: Forest Conservation and Restoration Using the Emberger Index: Cork Oak as Study Case
Source: MDPI journal article supplement (doi:10.3390/f13020252), 2022-02-06

**Supplementary Materials 1.** *Q-m* diagrams showing the relative position of real distribution of cork oak forests (green points cloud) within the Daget's Mediterranean isoclimate (grey points cloud) at present time (A), 2050 (B), 2070 (C). Each point of the clouds represents a surface of 30 arc-seconds (ca. 1 km<sup>2</sup>).

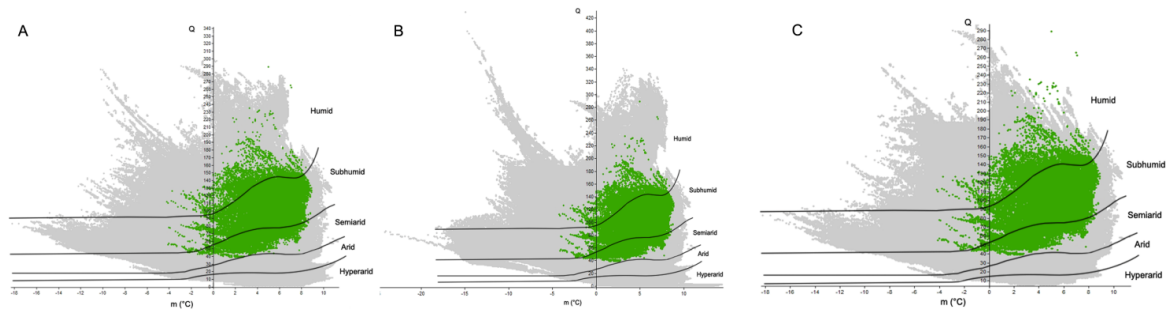

Supplement: s1 [file s1 › Supplementary Material 1.pdf]
