# Supplementary material for: Forest Conservation and Restoration Using the Emberger Index: Cork Oak as Study Case
Source: MDPI journal article supplement (doi:10.3390/f13020252), 2022-02-06
Supplement: s1 [file s1 › Supplementary material 2.xlsx]

## Sheet: Sheet1
Q Emberger	m	Class
67	3.7	10		Insert Q-m values to get the suitability class of a site
67	3.8	10
67	3.9	10
67	4	10
67	4.1	10
68	3.5	10		Q Emberger	67
68	3.6	10		m	3.7
68	3.7	10
68	3.8	10		Class of Suitability
68	3.9	10		10
68	4	10
68	4.1	10
70	5.6	10
70	5.7	10
70	5.8	10
71	5.6	10
71	5.7	10
85	7.4	10
86	7.3	10
86	7.4	10
86	7.5	10
87	7.3	10
87	7.4	10
87	7.5	10
88	7.4	10
97	7.1	10
97	7.2	10
98	7.1	10
66	3.9	9
66	4	9
66	4.1	9
67	3.5	9
67	3.6	9
67	4.2	9
68	3.4	9
68	4.2	9
69	3.3	9
69	3.4	9
69	3.5	9
69	3.6	9
69	3.7	9
69	3.8	9
69	3.9	9
69	4	9
69	4.1	9
69	4.2	9
69	5.6	9
69	5.7	9
69	5.8	9
69	5.9	9
70	3.3	9
70	3.4	9
70	3.5	9
70	5.5	9
70	5.9	9
70	6	9
71	5.5	9
71	5.8	9
71	5.9	9
71	6	9
83	7.3	9
84	7.3	9
84	7.4	9
85	7.3	9
85	7.5	9
88	7.3	9
88	7.5	9
89	7.4	9
95	7	9
95	7.1	9
95	7.2	9
96	7	9
96	7.1	9
96	7.2	9
96	7.3	9
97	7	9
97	7.3	9
98	7	9
98	7.2	9
99	7	9
99	7.1	9
65	4	8
66	3.7	8
66	3.8	8
66	4.2	8
67	3.4	8
67	4.3	8
68	3.2	8
68	3.3	8
68	4.3	8
68	5.7	8
68	5.8	8
69	3.1	8
69	3.2	8
69	4.3	8
69	5.5	8
69	6	8
69	6.1	8
70	3.1	8
70	3.2	8
70	3.6	8
70	3.7	8
70	3.8	8
70	3.9	8
70	4	8
70	4.1	8
70	4.2	8
70	5.4	8
70	6.1	8
70	6.2	8
71	3.2	8
71	3.3	8
71	3.4	8
71	5.4	8
71	6.1	8
71	6.2	8
71	6.3	8
72	5.4	8
72	5.5	8
72	5.6	8
72	5.7	8
72	5.8	8
72	6	8
72	6.1	8
72	6.2	8
72	6.3	8
82	7.2	8
82	7.3	8
82	7.4	8
83	7.2	8
83	7.4	8
84	7.2	8
84	7.5	8
85	7.2	8
85	7.6	8
86	7.2	8
86	7.6	8
87	7.2	8
87	7.6	8
88	7.2	8
88	7.6	8
89	7.3	8
89	7.5	8
90	7.4	8
91	6.5	8
91	6.6	8
91	6.7	8
92	6.5	8
92	6.6	8
92	6.7	8
92	6.8	8
93	6.5	8
93	6.6	8
93	6.7	8
93	6.8	8
93	6.9	8
94	6.6	8
94	6.7	8
94	6.8	8
94	6.9	8
94	7	8
94	7.1	8
94	7.2	8
95	6.8	8
95	6.9	8
95	7.3	8
95	7.4	8
96	6.9	8
96	7.4	8
97	6.9	8
97	7.4	8
98	6.9	8
98	7.3	8
99	6.9	8
99	7.2	8
99	7.3	8
100	6.9	8
100	7	8
100	7.1	8
100	7.2	8
65	3.8	7
65	3.9	7
65	4.1	7
65	4.2	7
66	3.6	7
66	4.3	7
67	3.3	7
67	4.4	7
68	3.1	7
68	4.4	7
68	4.5	7
68	5.6	7
68	5.9	7
69	3	7
69	4.4	7
69	5.4	7
69	6.2	7
70	3	7
70	4.3	7
70	4.4	7
70	5.3	7
70	6.3	7
70	6.4	7
71	3.1	7
71	3.5	7
71	3.6	7
71	3.7	7
71	3.8	7
71	3.9	7
71	4	7
71	4.1	7
71	4.2	7
71	4.3	7
71	5.3	7
71	6.4	7
71	6.5	7
72	5.2	7
72	5.3	7
72	5.9	7
72	6.4	7
72	6.5	7
73	5.4	7
73	5.5	7
73	6.1	7
73	6.2	7
73	6.3	7
73	6.4	7
80	7.1	7
80	7.2	7
81	7.1	7
81	7.2	7
81	7.3	7
81	7.4	7
82	7.1	7
82	7.5	7
83	7.1	7
83	7.5	7
84	7.1	7
84	7.6	7
85	7.1	7
86	7.1	7
87	6.2	7
87	6.3	7
87	6.4	7
88	6.2	7
88	6.3	7
88	6.4	7
88	6.5	7
89	6.3	7
89	6.4	7
89	6.5	7
89	6.6	7
89	7.2	7
89	7.6	7
90	6.3	7
90	6.4	7
90	6.5	7
90	6.6	7
90	6.7	7
90	7.2	7
90	7.3	7
90	7.5	7
91	6.3	7
91	6.4	7
91	6.8	7
91	7.3	7
91	7.4	7
92	6.3	7
92	6.4	7
92	6.9	7
93	6.3	7
93	6.4	7
93	7	7
93	7.1	7
93	7.2	7
93	7.3	7
93	7.4	7
94	6.4	7
94	6.5	7
94	7.3	7
94	7.4	7
95	6.6	7
95	6.7	7
96	6.7	7
96	6.8	7
97	6.8	7
98	6.8	7
98	7.4	7
99	6.8	7
99	7.4	7
100	6.8	7
100	7.3	7
100	7.4	7
100	7.5	7
100	7.6	7
101	6.8	7
101	6.9	7
101	7	7
101	7.1	7
101	7.2	7
101	7.3	7
101	7.4	7
101	7.5	7
101	7.6	7
101	7.7	7
102	6.9	7
102	7	7
102	7.1	7
102	7.2	7
102	7.3	7
102	7.4	7
102	7.5	7
102	7.6	7
102	7.7	7
103	7.4	7
103	7.5	7
103	7.6	7
103	7.7	7
110	4.7	7
64	3.8	6
64	3.9	6
64	4	6
64	4.1	6
65	3.6	6
65	3.7	6
65	4.3	6
66	3.4	6
66	3.5	6
66	4.4	6
67	3.2	6
67	4.5	6
67	4.6	6
67	5.7	6
67	5.8	6
68	3	6
68	4.6	6
68	5.5	6
68	6	6
68	6.1	6
69	2.9	6
69	4.5	6
69	4.6	6
69	5.3	6
69	6.3	6
69	6.4	6
70	2.9	6
70	4.5	6
70	4.6	6
70	4.7	6
70	5.2	6
70	6.5	6
70	6.6	6
71	2.9	6
71	3	6
71	4.4	6
71	4.5	6
71	4.6	6
71	4.7	6
71	4.8	6
71	4.9	6
71	5	6
71	5.1	6
71	5.2	6
71	6.6	6
71	6.7	6
72	3	6
72	3.1	6
72	3.2	6
72	3.3	6
72	3.4	6
72	3.5	6
72	3.6	6
72	3.7	6
72	3.8	6
72	3.9	6
72	4	6
72	4.1	6
72	4.2	6
72	4.3	6
72	4.4	6
72	4.9	6
72	5	6
72	5.1	6
72	6.6	6
72	6.7	6
72	6.8	6
73	3.3	6
73	4.1	6
73	4.2	6
73	4.3	6
73	4.9	6
73	5	6
73	5.1	6
73	5.2	6
73	5.3	6
73	5.6	6
73	5.7	6
73	5.8	6
73	5.9	6
73	6	6
73	6.5	6
73	6.6	6
73	6.7	6
74	6.1	6
74	6.2	6
74	6.3	6
74	6.4	6
74	6.5	6
77	7	6
77	7.1	6
78	7	6
78	7.1	6
78	7.2	6
79	6.9	6
79	7	6
79	7.1	6
79	7.2	6
80	6.9	6
80	7	6
80	7.3	6
80	7.4	6
81	6.1	6
81	6.9	6
81	7	6
82	5.9	6
82	6	6
82	6.1	6
82	6.2	6
82	7	6
83	5.9	6
83	6	6
83	6.1	6
83	6.2	6
83	7	6
83	7.6	6
84	5.8	6
84	5.9	6
84	6	6
84	6.1	6
84	6.2	6
84	7	6
85	5.8	6
85	5.9	6
85	6	6
85	6.1	6
85	6.2	6
85	6.3	6
85	6.4	6
85	7	6
86	5.9	6
86	6	6
86	6.1	6
86	6.2	6
86	6.3	6
86	6.4	6
86	6.5	6
86	6.6	6
86	7	6
86	7.7	6
87	6	6
87	6.1	6
87	6.5	6
87	6.6	6
87	6.7	6
87	7.1	6
87	7.7	6
88	6.1	6
88	6.6	6
88	6.7	6
88	7.1	6
88	7.7	6
89	6.1	6
89	6.2	6
89	6.7	6
89	6.8	6
89	7.1	6
90	6.2	6
90	6.8	6
90	6.9	6
90	7.1	6
90	7.6	6
91	5.4	6
91	5.5	6
91	5.6	6
91	6.2	6
91	6.9	6
91	7	6
91	7.1	6
91	7.2	6
91	7.5	6
92	5.3	6
92	5.4	6
92	5.5	6
92	5.6	6
92	6.2	6
92	7	6
92	7.1	6
92	7.2	6
92	7.3	6
92	7.4	6
92	7.5	6
93	5.2	6
93	5.3	6
93	5.4	6
93	5.5	6
93	5.6	6
93	6.2	6
93	7.5	6
94	5.3	6
94	5.4	6
94	5.5	6
94	5.6	6
94	6.2	6
94	6.3	6
94	7.5	6
95	5.4	6
95	6.4	6
95	6.5	6
95	7.5	6
96	6.6	6
96	7.5	6
96	7.6	6
97	6.6	6
97	6.7	6
97	7.5	6
97	7.6	6
98	6.7	6
98	7.5	6
98	7.6	6
99	6.6	6
99	6.7	6
99	7.5	6
99	7.6	6
100	6.6	6
100	6.7	6
100	7.7	6
100	7.8	6
101	6.7	6
101	7.8	6
102	6.7	6
102	6.8	6
102	7.8	6
103	6.8	6
103	6.9	6
103	7	6
103	7.1	6
103	7.2	6
103	7.3	6
103	7.8	6
104	7.4	6
104	7.5	6
104	7.6	6
104	7.7	6
107	4.8	6
107	4.9	6
108	4.6	6
108	4.7	6
108	4.8	6
108	4.9	6
109	4.5	6
109	4.6	6
109	4.7	6
109	4.8	6
109	4.9	6
110	4.5	6
110	4.6	6
110	4.8	6
110	4.9	6
111	4.4	6
111	4.5	6
111	4.6	6
111	4.7	6
111	4.8	6
111	4.9	6
112	4.4	6
112	4.5	6
112	4.6	6
112	4.7	6
112	4.8	6
113	4.5	6
113	4.6	6
63	3.8	5
63	3.9	5
63	4	5
63	4.1	5
64	3.7	5
64	4.2	5
64	4.3	5
65	3.5	5
65	4.4	5
65	4.5	5
66	3.3	5
66	4.5	5
66	4.6	5
67	3	5
67	3.1	5
67	4.7	5
67	4.8	5
67	5.5	5
67	5.6	5
67	5.9	5
67	6	5
68	2.9	5
68	4.7	5
68	4.8	5
68	4.9	5
68	5.3	5
68	5.4	5
68	6.2	5
68	6.3	5
69	2.7	5
69	2.8	5
69	4.7	5
69	4.8	5
69	4.9	5
69	5	5
69	5.1	5
69	5.2	5
69	6.5	5
69	6.6	5
70	2.7	5
70	2.8	5
70	4.8	5
70	4.9	5
70	5	5
70	5.1	5
70	6.7	5
71	2.6	5
71	2.7	5
71	2.8	5
71	6.8	5
71	6.9	5
72	2.8	5
72	2.9	5
72	4.5	5
72	4.6	5
72	4.7	5
72	4.8	5
72	6.9	5
73	3	5
73	3.1	5
73	3.2	5
73	3.4	5
73	3.5	5
73	3.6	5
73	3.7	5
73	3.8	5
73	3.9	5
73	4	5
73	4.4	5
73	4.5	5
73	4.6	5
73	4.7	5
73	4.8	5
73	6.8	5
73	6.9	5
73	7	5
74	3.2	5
74	3.3	5
74	3.4	5
74	3.5	5
74	3.9	5
74	4	5
74	4.1	5
74	4.2	5
74	4.3	5
74	4.4	5
74	4.5	5
74	4.9	5
74	5	5
74	5.1	5
74	5.2	5
74	5.3	5
74	5.4	5
74	5.5	5
74	6	5
74	6.6	5
74	6.7	5
74	6.8	5
74	6.9	5
74	7	5
75	4.1	5
75	4.2	5
75	4.3	5
75	6.1	5
75	6.2	5
75	6.3	5
75	6.4	5
75	6.5	5
75	6.9	5
75	7	5
75	7.1	5
76	6.2	5
76	6.9	5
76	7	5
76	7.1	5
76	7.2	5
77	6.8	5
77	6.9	5
77	7.2	5
78	6.8	5
78	6.9	5
78	7.3	5
79	6.8	5
79	7.3	5
80	5.9	5
80	6	5
80	6.1	5
80	6.2	5
80	6.3	5
80	6.8	5
81	5.8	5
81	5.9	5
81	6	5
81	6.2	5
81	6.3	5
81	6.4	5
81	6.7	5
81	6.8	5
81	7.5	5
82	5.7	5
82	5.8	5
82	6.3	5
82	6.4	5
82	6.5	5
82	6.6	5
82	6.7	5
82	6.8	5
82	6.9	5
82	7.6	5
83	5.7	5
83	5.8	5
83	6.3	5
83	6.4	5
83	6.5	5
83	6.6	5
83	6.7	5
83	6.8	5
83	6.9	5
84	5.7	5
84	6.3	5
84	6.4	5
84	6.5	5
84	6.6	5
84	6.7	5
84	6.8	5
84	6.9	5
84	7.7	5
85	5.7	5
85	6.5	5
85	6.6	5
85	6.7	5
85	6.8	5
85	6.9	5
85	7.7	5
86	5.7	5
86	5.8	5
86	6.7	5
86	6.8	5
86	6.9	5
87	5.7	5
87	5.8	5
87	5.9	5
87	6.8	5
87	6.9	5
87	7	5
88	5.8	5
88	5.9	5
88	6	5
88	6.8	5
88	6.9	5
88	7	5
89	5.5	5
89	5.6	5
89	5.7	5
89	5.8	5
89	5.9	5
89	6	5
89	6.9	5
89	7	5
89	7.7	5
90	5.3	5
90	5.4	5
90	5.5	5
90	5.6	5
90	5.7	5
90	5.8	5
90	5.9	5
90	6	5
90	6.1	5
90	7	5
90	7.7	5
91	5.2	5
91	5.3	5
91	5.7	5
91	5.8	5
91	5.9	5
91	6	5
91	6.1	5
91	7.6	5
92	5.1	5
92	5.2	5
92	5.7	5
92	5.8	5
92	5.9	5
92	6	5
92	6.1	5
92	7.6	5
93	5.1	5
93	5.7	5
93	5.8	5
93	5.9	5
93	6	5
93	6.1	5
93	7.6	5
94	5.1	5
94	5.2	5
94	5.7	5
94	5.8	5
94	5.9	5
94	6	5
94	6.1	5
94	7.6	5
95	5.2	5
95	5.3	5
95	5.5	5
95	5.6	5
95	5.7	5
95	5.8	5
95	5.9	5
95	6	5
95	6.1	5
95	6.2	5
95	6.3	5
95	7.6	5
96	5.2	5
96	5.3	5
96	5.4	5
96	5.5	5
96	5.6	5
96	5.7	5
96	5.8	5
96	5.9	5
96	6	5
96	6.1	5
96	6.2	5
96	6.3	5
96	6.4	5
96	6.5	5
96	7.7	5
97	5.3	5
97	5.4	5
97	5.5	5
97	5.6	5
97	5.7	5
97	5.8	5
97	5.9	5
97	6	5
97	6.4	5
97	6.5	5
97	7.7	5
98	5.3	5
98	5.4	5
98	5.5	5
98	5.6	5
98	5.9	5
98	6	5
98	6.5	5
98	6.6	5
98	7.7	5
99	5.3	5
99	5.4	5
99	5.9	5
99	6	5
99	6.5	5
99	7.7	5
99	7.8	5
100	5.3	5
100	5.4	5
100	5.9	5
100	6	5
100	6.1	5
100	6.2	5
100	6.3	5
100	6.4	5
100	6.5	5
100	7.9	5
101	5.1	5
101	5.2	5
101	5.3	5
101	5.4	5
101	5.9	5
101	6	5
101	6.1	5
101	6.2	5
101	6.3	5
101	6.4	5
101	6.5	5
101	6.6	5
101	7.9	5
102	4.9	5
102	5	5
102	5.1	5
102	5.2	5
102	5.3	5
102	5.4	5
102	6.1	5
102	6.2	5
102	6.3	5
102	6.4	5
102	6.5	5
102	6.6	5
102	7.9	5
103	4.8	5
103	4.9	5
103	5	5
103	5.1	5
103	5.2	5
103	5.3	5
103	5.4	5
103	6.6	5
103	6.7	5
103	7.9	5
104	4.8	5
104	4.9	5
104	5	5
104	5.1	5
104	5.2	5
104	6.7	5
104	6.8	5
104	6.9	5
104	7	5
104	7.1	5
104	7.2	5
104	7.3	5
104	7.8	5
105	4.7	5
105	4.8	5
105	4.9	5
105	5	5
105	5.1	5
105	5.2	5
105	6.7	5
105	6.8	5
105	6.9	5
105	7	5
105	7.1	5
105	7.2	5
105	7.3	5
105	7.4	5
105	7.5	5
105	7.6	5
106	4.7	5
106	4.8	5
106	4.9	5
106	5	5
106	5.1	5
106	6.7	5
107	4.6	5
107	4.7	5
107	5	5
107	5.1	5
107	6.6	5
107	6.7	5
108	4.5	5
108	5	5
108	5.1	5
108	6.6	5
108	6.7	5
109	4.4	5
109	5	5
109	5.1	5
109	6.6	5
109	6.7	5
109	7	5
109	7.1	5
109	7.2	5
109	7.3	5
110	4.3	5
110	4.4	5
110	5	5
110	5.1	5
110	6.8	5
110	6.9	5
110	7	5
110	7.1	5
110	7.2	5
110	7.3	5
111	4.2	5
111	4.3	5
111	5	5
111	5.1	5
111	6.7	5
111	6.8	5
111	6.9	5
111	7	5
111	7.1	5
111	7.2	5
112	4.2	5
112	4.3	5
112	4.9	5
112	5	5
112	6.7	5
112	6.8	5
112	6.9	5
112	7	5
112	7.1	5
113	4.2	5
113	4.3	5
113	4.4	5
113	4.7	5
113	4.8	5
113	4.9	5
113	6.7	5
113	6.8	5
113	6.9	5
113	7	5
113	7.1	5
114	4.3	5
114	4.4	5
114	4.5	5
114	4.6	5
114	4.7	5
114	6.8	5
114	6.9	5
114	7	5
114	8.1	5
114	8.2	5
115	4.4	5
115	4.5	5
45	3.6	4
46	3.5	4
46	3.6	4
46	3.7	4
47	3.5	4
47	3.6	4
47	3.7	4
47	3.8	4
48	3.6	4
48	3.7	4
50	1.4	4
50	1.5	4
50	1.6	4
50	1.7	4
51	1.3	4
51	1.4	4
51	1.5	4
51	1.6	4
51	1.7	4
51	1.8	4
52	1.3	4
52	1.4	4
52	1.5	4
52	1.6	4
61	3.8	4
61	3.9	4
62	3.7	4
62	3.8	4
62	3.9	4
62	4	4
62	4.1	4
63	3.7	4
63	4.2	4
63	4.3	4
64	3.6	4
64	4.4	4
65	3.4	4
65	4.6	4
65	4.7	4
66	3.1	4
66	3.2	4
66	4.7	4
66	4.8	4
66	4.9	4
66	5.7	4
66	5.8	4
67	2.8	4
67	2.9	4
67	4.9	4
67	5	4
67	5.1	4
67	5.2	4
67	5.3	4
67	5.4	4
67	6.1	4
67	6.2	4
68	2.6	4
68	2.7	4
68	2.8	4
68	5	4
68	5.1	4
68	5.2	4
68	6.4	4
68	6.5	4
69	2.4	4
69	2.5	4
69	2.6	4
69	6.7	4
69	6.8	4
70	2.3	4
70	2.4	4
70	2.5	4
70	2.6	4
70	6.8	4
70	6.9	4
71	2.1	4
71	2.2	4
71	2.3	4
71	2.4	4
71	2.5	4
71	7	4
72	2.1	4
72	2.2	4
72	2.3	4
72	2.4	4
72	2.5	4
72	2.6	4
72	2.7	4
72	7	4
72	7.1	4
73	2.1	4
73	2.2	4
73	2.3	4
73	2.4	4
73	2.5	4
73	2.6	4
73	2.7	4
73	2.8	4
73	2.9	4
73	7.1	4
74	2.9	4
74	3	4
74	3.1	4
74	3.6	4
74	3.7	4
74	3.8	4
74	4.6	4
74	4.7	4
74	4.8	4
74	5.6	4
74	5.7	4
74	5.8	4
74	5.9	4
74	7.1	4
74	7.2	4
75	3	4
75	3.1	4
75	3.2	4
75	3.3	4
75	3.4	4
75	3.5	4
75	3.6	4
75	3.7	4
75	3.8	4
75	3.9	4
75	4	4
75	4.4	4
75	4.5	4
75	4.6	4
75	4.9	4
75	5	4
75	5.1	4
75	5.2	4
75	5.3	4
75	5.4	4
75	5.5	4
75	5.6	4
75	5.9	4
75	6	4
75	6.6	4
75	6.7	4
75	6.8	4
75	7.2	4
76	3.4	4
76	3.5	4
76	3.6	4
76	3.7	4
76	3.8	4
76	3.9	4
76	4	4
76	4.1	4
76	4.2	4
76	4.3	4
76	4.4	4
76	5.9	4
76	6	4
76	6.1	4
76	6.3	4
76	6.4	4
76	6.5	4
76	6.6	4
76	6.7	4
76	6.8	4
76	7.3	4
77	4.1	4
77	4.2	4
77	5.5	4
77	5.6	4
77	5.9	4
77	6	4
77	6.1	4
77	6.2	4
77	6.3	4
77	6.4	4
77	6.6	4
77	6.7	4
77	7.3	4
78	5.4	4
78	5.5	4
78	5.6	4
78	5.7	4
78	5.8	4
78	5.9	4
78	6	4
78	6.1	4
78	6.2	4
78	6.3	4
78	6.4	4
78	6.6	4
78	6.7	4
79	5.3	4
79	5.4	4
79	5.5	4
79	5.6	4
79	5.7	4
79	5.8	4
79	5.9	4
79	6	4
79	6.1	4
79	6.2	4
79	6.3	4
79	6.4	4
79	6.5	4
79	6.6	4
79	6.7	4
79	7.4	4
80	5.3	4
80	5.4	4
80	5.5	4
80	5.6	4
80	5.7	4
80	5.8	4
80	6.4	4
80	6.5	4
80	6.6	4
80	6.7	4
80	7.5	4
81	5.3	4
81	5.4	4
81	5.5	4
81	5.6	4
81	5.7	4
81	6.5	4
81	6.6	4
81	7.6	4
82	5.6	4
82	7.7	4
83	5.6	4
83	7.7	4
84	5.6	4
85	5.6	4
85	7.8	4
86	5.6	4
86	7.8	4
87	5.5	4
87	5.6	4
87	7.8	4
88	5.5	4
88	5.6	4
88	5.7	4
88	7.8	4
89	5.3	4
89	5.4	4
89	7.8	4
90	5.1	4
90	5.2	4
90	7.8	4
91	5	4
91	5.1	4
91	7.7	4
91	7.8	4
92	4.9	4
92	5	4
92	7.7	4
93	4.9	4
93	5	4
93	7.7	4
94	4.9	4
94	5	4
94	7.7	4
95	4.9	4
95	5	4
95	5.1	4
95	7.7	4
95	7.8	4
96	4.9	4
96	5	4
96	5.1	4
96	7.8	4
97	5	4
97	5.1	4
97	5.2	4
97	6.1	4
97	6.2	4
97	6.3	4
97	7.8	4
98	5	4
98	5.1	4
98	5.2	4
98	5.7	4
98	5.8	4
98	6.1	4
98	6.2	4
98	6.3	4
98	6.4	4
98	7.8	4
98	7.9	4
99	4.8	4
99	4.9	4
99	5	4
99	5.1	4
99	5.2	4
99	5.5	4
99	5.6	4
99	5.7	4
99	5.8	4
99	6.1	4
99	6.2	4
99	6.3	4
99	6.4	4
99	7.9	4
100	4.7	4
100	4.8	4
100	4.9	4
100	5	4
100	5.1	4
100	5.2	4
100	5.5	4
100	5.6	4
100	5.7	4
100	5.8	4
100	8	4
101	4.7	4
101	4.8	4
101	4.9	4
101	5	4
101	5.5	4
101	5.6	4
101	5.7	4
101	5.8	4
101	8	4
102	4.7	4
102	4.8	4
102	5.5	4
102	5.6	4
102	5.7	4
102	5.8	4
102	5.9	4
102	6	4
102	8	4
103	4.7	4
103	5.5	4
103	5.6	4
103	5.7	4
103	5.8	4
103	5.9	4
103	6	4
103	6.1	4
103	6.2	4
103	6.3	4
103	6.4	4
103	6.5	4
103	8	4
104	4.6	4
104	4.7	4
104	5.3	4
104	5.4	4
104	5.5	4
104	5.6	4
104	5.7	4
104	5.8	4
104	5.9	4
104	6	4
104	6.1	4
104	6.2	4
104	6.3	4
104	6.4	4
104	6.5	4
104	6.6	4
104	7.9	4
104	8	4
105	4.5	4
105	4.6	4
105	5.3	4
105	5.4	4
105	5.5	4
105	5.6	4
105	5.7	4
105	5.8	4
105	6.5	4
105	6.6	4
105	7.7	4
105	7.8	4
105	7.9	4
106	4.5	4
106	4.6	4
106	5.2	4
106	5.3	4
106	5.4	4
106	5.5	4
106	6.5	4
106	6.6	4
106	6.8	4
106	6.9	4
106	7	4
106	7.1	4
106	7.2	4
106	7.3	4
106	7.4	4
106	7.5	4
106	7.6	4
107	4.4	4
107	4.5	4
107	5.2	4
107	5.3	4
107	5.4	4
107	6.4	4
107	6.5	4
107	6.8	4
107	6.9	4
107	7	4
107	7.1	4
107	7.2	4
107	7.3	4
107	7.4	4
107	7.5	4
108	4.1	4
108	4.2	4
108	4.3	4
108	4.4	4
108	5.2	4
108	5.3	4
108	6.4	4
108	6.5	4
108	6.8	4
108	6.9	4
108	7	4
108	7.1	4
108	7.2	4
108	7.3	4
108	7.4	4
109	4	4
109	4.1	4
109	4.2	4
109	4.3	4
109	5.2	4
109	5.3	4
109	6.4	4
109	6.5	4
109	6.8	4
109	6.9	4
109	7.4	4
110	4	4
110	4.1	4
110	4.2	4
110	5.2	4
110	5.3	4
110	6.4	4
110	6.5	4
110	6.6	4
110	6.7	4
110	7.4	4
111	4	4
111	4.1	4
111	5.2	4
111	6.4	4
111	6.5	4
111	6.6	4
111	7.3	4
111	7.4	4
112	4	4
112	4.1	4
112	5.1	4
112	5.2	4
112	6.5	4
112	6.6	4
112	7.2	4
112	7.3	4
112	8.1	4
112	8.2	4
113	4	4
113	4.1	4
113	5	4
113	5.1	4
113	6.6	4
113	7.2	4
113	8	4
113	8.1	4
113	8.2	4
113	8.3	4
114	4.1	4
114	4.2	4
114	4.8	4
114	4.9	4
114	5	4
114	6.6	4
114	6.7	4
114	7.1	4
114	8	4
114	8.3	4
115	4.1	4
115	4.2	4
115	4.3	4
115	4.6	4
115	4.7	4
115	4.8	4
115	6.7	4
115	6.8	4
115	6.9	4
115	7	4
115	8.1	4
115	8.2	4
116	4.1	4
116	4.2	4
116	4.3	4
116	4.4	4
116	4.5	4
116	4.6	4
117	4	4
117	4.1	4
117	4.2	4
117	4.3	4
117	4.4	4
117	4.5	4
118	4	4
118	4.1	4
118	4.2	4
118	4.3	4
118	4.4	4
118	4.5	4
119	4	4
119	4.1	4
119	4.2	4
119	4.3	4
119	4.4	4
120	4.1	4
120	4.2	4
120	4.3	4
78	7.4	4
44	3.5	3
44	3.6	3
45	3.4	3
45	3.5	3
45	3.7	3
45	3.8	3
46	3.8	3
47	3.9	3
48	1.7	3
48	1.8	3
48	3.4	3
48	3.5	3
48	3.8	3
49	1.3	3
49	1.4	3
49	1.5	3
49	1.6	3
49	1.7	3
49	1.8	3
49	1.9	3
49	2	3
49	2.1	3
49	3.5	3
49	3.6	3
49	3.7	3
49	3.8	3
50	1.2	3
50	1.3	3
50	1.8	3
50	1.9	3
50	2	3
50	2.1	3
50	2.2	3
51	1.1	3
51	1.2	3
51	1.9	3
51	2	3
51	2.1	3
51	2.2	3
52	1.1	3
52	1.2	3
52	1.7	3
52	1.8	3
52	1.9	3
52	2	3
52	2.1	3
52	2.2	3
53	1.1	3
53	1.2	3
53	1.3	3
53	1.4	3
53	1.5	3
53	1.6	3
53	1.7	3
53	1.8	3
53	1.9	3
53	2	3
53	2.1	3
53	2.2	3
54	1.2	3
54	1.3	3
54	1.4	3
54	1.5	3
54	1.6	3
54	1.7	3
54	1.8	3
56	3.6	3
56	3.7	3
56	3.8	3
57	3.6	3
57	3.7	3
57	3.8	3
58	3.6	3
58	3.7	3
58	3.8	3
58	3.9	3
59	3.5	3
59	3.6	3
59	3.7	3
59	3.8	3
59	3.9	3
60	3.5	3
60	3.6	3
60	3.7	3
60	3.8	3
60	3.9	3
61	3.5	3
61	3.6	3
61	3.7	3
61	4	3
61	4.1	3
62	3.5	3
62	3.6	3
62	4.2	3
63	3.5	3
63	3.6	3
63	4.4	3
63	4.5	3
64	3.4	3
64	3.5	3
64	4.5	3
64	4.6	3
64	4.7	3
64	4.8	3
65	2.9	3
65	3	3
65	3.1	3
65	3.2	3
65	3.3	3
65	4.8	3
65	4.9	3
65	5	3
65	5.6	3
65	5.7	3
65	5.8	3
66	2.7	3
66	2.8	3
66	2.9	3
66	3	3
66	5	3
66	5.1	3
66	5.2	3
66	5.3	3
66	5.4	3
66	5.5	3
66	5.6	3
66	5.9	3
66	6	3
67	2.5	3
67	2.6	3
67	2.7	3
67	6.3	3
67	6.4	3
67	6.5	3
68	2.3	3
68	2.4	3
68	2.5	3
68	6.6	3
68	6.7	3
69	2.1	3
69	2.2	3
69	2.3	3
69	6.9	3
70	1.9	3
70	2	3
70	2.1	3
70	2.2	3
70	7.1	3
71	1.9	3
71	2	3
71	7.1	3
72	1.9	3
72	2	3
72	7.2	3
73	1.9	3
73	2	3
73	7.2	3
74	2	3
74	2.1	3
74	2.2	3
74	2.3	3
74	2.4	3
74	2.5	3
74	2.6	3
74	2.7	3
74	2.8	3
74	7.3	3
75	2.1	3
75	2.2	3
75	2.3	3
75	2.4	3
75	2.5	3
75	2.6	3
75	2.7	3
75	2.8	3
75	2.9	3
75	4.7	3
75	4.8	3
75	5.7	3
75	5.8	3
75	7.3	3
75	7.4	3
76	2.7	3
76	2.8	3
76	2.9	3
76	3	3
76	3.1	3
76	3.2	3
76	3.3	3
76	4.5	3
76	4.6	3
76	5	3
76	5.1	3
76	5.2	3
76	5.3	3
76	5.4	3
76	5.5	3
76	5.6	3
76	5.7	3
76	5.8	3
76	7.4	3
77	2.9	3
77	3	3
77	3.1	3
77	3.2	3
77	3.3	3
77	3.4	3
77	3.5	3
77	3.6	3
77	3.7	3
77	3.8	3
77	3.9	3
77	4	3
77	4.3	3
77	4.4	3
77	4.5	3
77	5.2	3
77	5.3	3
77	5.4	3
77	5.7	3
77	5.8	3
77	6.5	3
77	7.4	3
78	3	3
78	3.1	3
78	3.2	3
78	3.3	3
78	3.4	3
78	3.5	3
78	3.6	3
78	3.7	3
78	3.8	3
78	3.9	3
78	4	3
78	4.1	3
78	4.2	3
78	4.3	3
78	4.4	3
78	5.2	3
78	5.3	3
78	6.5	3
78	7.5	3
79	3	3
79	3.1	3
79	3.2	3
79	3.3	3
79	3.4	3
79	3.5	3
79	3.6	3
79	3.7	3
79	5.1	3
79	5.2	3
79	7.5	3
79	7.6	3
80	2.9	3
80	3	3
80	3.1	3
80	3.2	3
80	3.3	3
80	3.4	3
80	3.5	3
80	5.1	3
80	5.2	3
80	7.6	3
81	3.2	3
81	3.3	3
81	5.1	3
81	5.2	3
81	7.7	3
82	5	3
82	5.1	3
82	5.2	3
82	5.3	3
82	5.4	3
82	5.5	3
82	7.8	3
83	4.7	3
83	4.8	3
83	4.9	3
83	5	3
83	5.1	3
83	5.2	3
83	5.5	3
83	7.8	3
84	4.7	3
84	4.8	3
84	4.9	3
84	5	3
84	5.4	3
84	5.5	3
84	7.8	3
85	4.7	3
85	4.8	3
85	4.9	3
85	5	3
85	5.4	3
85	5.5	3
86	4.7	3
86	4.8	3
86	4.9	3
86	5	3
86	5.1	3
86	5.4	3
86	5.5	3
86	7.9	3
87	4.7	3
87	4.8	3
87	4.9	3
87	5	3
87	5.1	3
87	5.2	3
87	5.3	3
87	5.4	3
87	7.9	3
88	4.7	3
88	4.8	3
88	4.9	3
88	5	3
88	5.1	3
88	5.2	3
88	5.3	3
88	5.4	3
88	7.9	3
89	4.7	3
89	4.8	3
89	4.9	3
89	5	3
89	5.1	3
89	5.2	3
89	7.9	3
90	4.3	3
90	4.4	3
90	4.5	3
90	4.6	3
90	4.7	3
90	4.8	3
90	4.9	3
90	5	3
90	7.9	3
91	4	3
91	4.1	3
91	4.2	3
91	4.3	3
91	4.4	3
91	4.5	3
91	4.6	3
91	4.7	3
91	4.8	3
91	4.9	3
91	7.9	3
92	3.9	3
92	4	3
92	4.1	3
92	4.2	3
92	4.3	3
92	4.4	3
92	4.5	3
92	4.6	3
92	4.7	3
92	4.8	3
92	7.8	3
92	7.9	3
93	3.9	3
93	4	3
93	4.1	3
93	4.2	3
93	4.3	3
93	4.4	3
93	4.5	3
93	4.6	3
93	4.7	3
93	4.8	3
93	7.8	3
93	7.9	3
94	4	3
94	4.1	3
94	4.5	3
94	4.6	3
94	4.7	3
94	4.8	3
94	7.8	3
94	7.9	3
95	4.5	3
95	4.6	3
95	4.7	3
95	4.8	3
95	7.9	3
96	4.5	3
96	4.6	3
96	4.7	3
96	4.8	3
96	7.9	3
97	4.5	3
97	4.6	3
97	4.7	3
97	4.8	3
97	4.9	3
97	7.9	3
97	8	3
98	4.4	3
98	4.5	3
98	4.6	3
98	4.7	3
98	4.8	3
98	4.9	3
98	8	3
99	4.4	3
99	4.5	3
99	4.6	3
99	4.7	3
99	8	3
100	4.4	3
100	4.5	3
100	4.6	3
100	8.1	3
101	3.8	3
101	3.9	3
101	4.3	3
101	4.4	3
101	4.5	3
101	4.6	3
101	8.1	3
102	3.8	3
102	3.9	3
102	4	3
102	4.1	3
102	4.2	3
102	4.3	3
102	4.4	3
102	4.5	3
102	4.6	3
102	8.1	3
103	3.8	3
103	3.9	3
103	4	3
103	4.1	3
103	4.2	3
103	4.3	3
103	4.4	3
103	4.5	3
103	4.6	3
103	8.1	3
104	3.8	3
104	3.9	3
104	4	3
104	4.1	3
104	4.2	3
104	4.3	3
104	4.4	3
104	4.5	3
[truncated: 6,504 more rows]
